# Supplementary material for: Understanding symptoms suggestive of long COVID syndrome and healthcare use among community-based populations in Manitoba, Canada: an observational cross-sectional survey
Source: PubMed Central journal article supplement — BMJ Open. 2024 Jan 12;14(1):e075301. doi: 10.1136/bmjopen-2023-075301 (PMC10806674; doi:10.1136/bmjopen-2023-075301), 2024-01-12
Supplement: bmjopen-2023-075301supp005.pdf [file bmjopen-2023-075301supp005.pdf]

| Respondents self-reported healthcare use, by symptoms          |                       |                  |                       |                  |                         |                    |                         |                         |                         |                         |
|----------------------------------------------------------------|-----------------------|------------------|-----------------------|------------------|-------------------------|--------------------|-------------------------|-------------------------|-------------------------|-------------------------|
| Symptoms                                                       | COVID-19              |                  | LCS                   |                  |                         |                    |                         |                         |                         |                         |
|                                                                | Primary Care<br>n=148 | Hospital<br>n=22 | Primary Care<br>n=211 | Hospital<br>n=21 | ED <sup>1</sup><br>n=50 | Specialist<br>n=93 | PT <sup>2</sup><br>n=53 | OT <sup>3</sup><br>n=23 | RT <sup>4</sup><br>n=33 | ST <sup>5</sup><br>n=<5 |
| Extreme<br>Fatigue, n (%)                                      | 142<br>(95.9)         | 22<br>(100)      | 184<br>(87.2)         | 19<br>(90.5)     | 45<br>(90.0)            | 81<br>(87.1)       | 50<br>(94.3)            | 21<br>(91.3)            | 30<br>(90.9)            | <5<br>(66.7)            |
| Headaches, n (%)                                               | 137<br>(92.6)         | 18<br>(81.8)     | 149<br>(70.6)         | 15<br>(71.4)     | 42<br>(84.0)            | 73<br>(78.5)       | 42<br>(79.2)            | 21<br>(91.3)            | 29<br>(87.9)            | <5<br>(33.3)            |
| Cough /noisy<br>breathing, n (%)                               | 132<br>(89.2)         | 18<br>(81.8)     | 130<br>(61.6)         | 17<br>(80.9)     | 38<br>(76.0)            | 53<br>(57.0)       | 31<br>(58.5)            | 16<br>(69.6)            | 27<br>(81.8)            | <5<br>(100)             |
| General muscle<br>weakness, n (%)                              | 124<br>(83.8)         | 20<br>(90.9)     | 138<br>(65.4)         | 16<br>(76.2)     | 35<br>(70.0)            | 64<br>(68.8)       | 42<br>(79.2)            | 19<br>(82.6)            | 25<br>(75.8)            | <5<br>(66.7)            |
| Muscle or joint<br>pain, n (%)                                 | 129<br>(87.2)         | 19<br>(86.4)     | 142<br>(67.3)         | 17<br>(80.9)     | 36<br>(72.0)            | 63<br>(67.7)       | 42<br>(79.2)            | 17<br>(73.9)            | 24<br>(72.7)            | <5<br>(66.7)            |
| SOB with<br>activity, n (%)                                    | 130<br>(87.8)         | 18<br>(81.8)     | 163<br>(77.3)         | 19<br>(90.5)     | 46<br>(92.0)            | 77<br>(82.8)       | 44<br>(83.0)            | 19<br>(82.6)            | 31<br>(93.9)            | <5<br>(100)             |
| Issues with<br>concentration,<br>thinking and<br>memory, n (%) | 123<br>(83.1)         | 19<br>(86.4)     | 179<br>(84.8)         | 21<br>(100)      | 46<br>(92.0)            | 79<br>(84.9)       | 51<br>(96.2)            | 22<br>(95.7)            | 30<br>(90.9)            | <5<br>(100)             |
| Issues with pain<br>or discomfort, n (%)                       | 114<br>(77.0)         | 20<br>(90.9)     | 136<br>(64.5)         | 17<br>(80.9)     | 41<br>(82.0)            | 62<br>(66.7)       | 40<br>(75.5)            | 18<br>(78.6)            | 23<br>(69.7)            | <5<br>(100)             |
| Difficulty<br>sleeping, n (%)                                  | 107<br>(72.3)         | 17<br>(77.3)     | 148<br>(70.1)         | 16<br>(76.2)     | 40<br>(80.0)            | 66<br>(71.0)       | 38<br>(71.7)            | 18<br>(78.6)            | 27<br>(81.9)            | <5<br>(33.3)            |
| Anxiety, n (%)                                                 | 113<br>(76.4)         | 19<br>(86.4)     | 147<br>(69.6)         | 18<br>(85.7)     | 40<br>(80.0)            | 68<br>(73.1)       | 41<br>(77.4)            | 21<br>(91.3)            | 24<br>(72.7)            | <5<br>(66.7)            |
| SOB at rest, n (%)                                             | 122<br>(82.4)         | 17<br>(77.3)     | 123<br>(58.3)         | 15<br>(71.4)     | 38<br>(76.0)            | 56<br>(60.2)       | 31<br>(58.5)            | 14<br>(60.9)            | 24<br>(72.7)            | <5<br>(66.7)            |
| Dizziness, faint,<br>Loss of<br>consciousness,<br>n (%)        | 84<br>(56.8)          | 11<br>(50.0)     | 121<br>(57.3)         | 13<br>(61.9)     | 39<br>(78.0)            | 59<br>(63.4)       | 39<br>(73.6)            | 15<br>(65.2)            | 25<br>(75.8)            | <5<br>(66.7)            |
| Chest pain at<br>activity, n (%)                               | 105<br>(70.9)         | 16<br>(72.7)     | 112<br>(53.1)         | 14<br>(66.7)     | 34<br>(68.0)            | 58<br>(62.4)       | 33<br>(62.3)            | 15<br>(65.2)            | 22<br>(66.7)            | <5<br>(33.3)            |
| Depression, n (%)                                              | 93<br>(62.8)          | 17<br>(77.3)     | 123<br>(58.3)         | 14<br>(66.7)     | 30<br>(60.0)            | 54<br>(58.1)       | 31<br>(58.5)            | 15<br>(65.2)            | 22<br>(66.7)            | 0                       |
| Chest pain at<br>rest, n (%)                                   | 99<br>(66.9)          | 16<br>(72.7)     | 87<br>(41.2)          | 11<br>(52.4)     | 34<br>(68.0)            | 47<br>(50.5)       | 27<br>(50.9)            | 11<br>(47.8)            | 18<br>(54.5)            | <5<br>(33.3)            |
| Difficulty<br>eating, drinking                                 | 65<br>(43.9)          | 13<br>(59.1)     | 50<br>(23.7)          | 8<br>(38.1)      | 19<br>(38.0)            | 24<br>(25.8)       | 12<br>(22.6)            | <5<br>(17.4)            | 9<br>(27.3)             | <5<br>(100)             |

|                                                    |              |              |              |              |              |              |              |              |              |              |
|----------------------------------------------------|--------------|--------------|--------------|--------------|--------------|--------------|--------------|--------------|--------------|--------------|
| and swallowing, n (%)                              |              |              |              |              |              |              |              |              |              |              |
| Difficulty walking, n (%)                          | 71<br>(48.0) | 14<br>(63.6) | 81<br>(8.4)  | 10<br>(47.6) | 27<br>(54.0) | 44<br>(47.3) | 27<br>(50.9) | 11<br>(47.8) | 15<br>(45.5) | <5<br>(33.3) |
| Difficulty controlling movement of the body, n (%) | 55<br>(37.2) | 10<br>(45.5) | 59<br>(28.0) | 11<br>(52.4) | 17<br>(34.0) | 30<br>(32.3) | 16<br>(30.2) | 8<br>(34.8)  | 11<br>(33.3) | <5<br>(33.3) |
| Other, n (%)                                       | 58<br>(39.2) | 10<br>(45.5) | 54<br>(25.6) | 7<br>(33.3)  | 14<br>(28.0) | 27<br>(29.0) | 12<br>(22.6) | <5<br>(17.4) | <5<br>(12.1) | <5<br>(33.3) |

*\*Each person may have more than one symptom*

<sup>1</sup> Emergency department, <sup>2</sup> Physiotherapist, <sup>3</sup> Occupational therapist, <sup>4</sup> Respiratory therapist, <sup>5</sup> Speech therapist.
