# Supplementary figures and images for: Understanding symptoms suggestive of long COVID syndrome and healthcare use among community-based populations in Manitoba, Canada: an observational cross-sectional survey
Source: PubMed Central journal article supplement — BMJ Open. 2024 Jan 12;14(1):e075301. doi: 10.1136/bmjopen-2023-075301 (PMC10806674; doi:10.1136/bmjopen-2023-075301), 2024-01-12

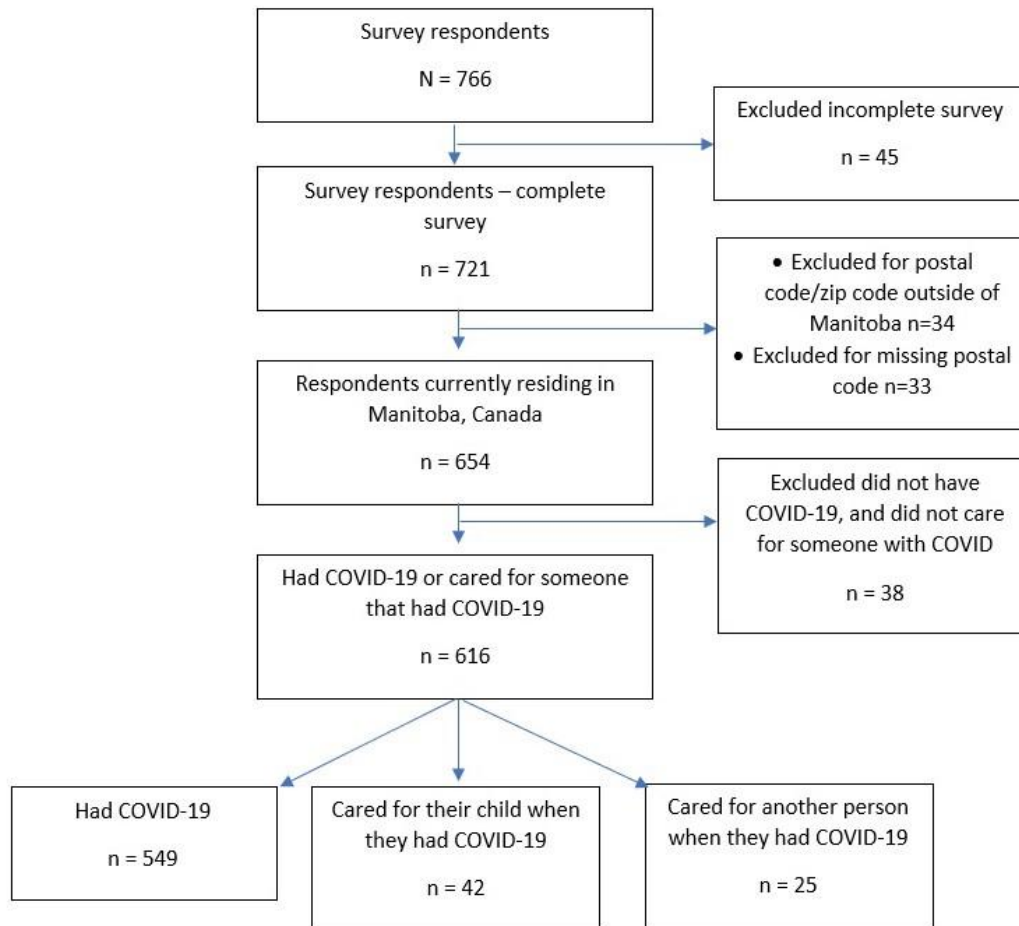

Supplement: bmjopen-2023-075301supp003.pdf [file bmjopen-2023-075301supp003.pdf]

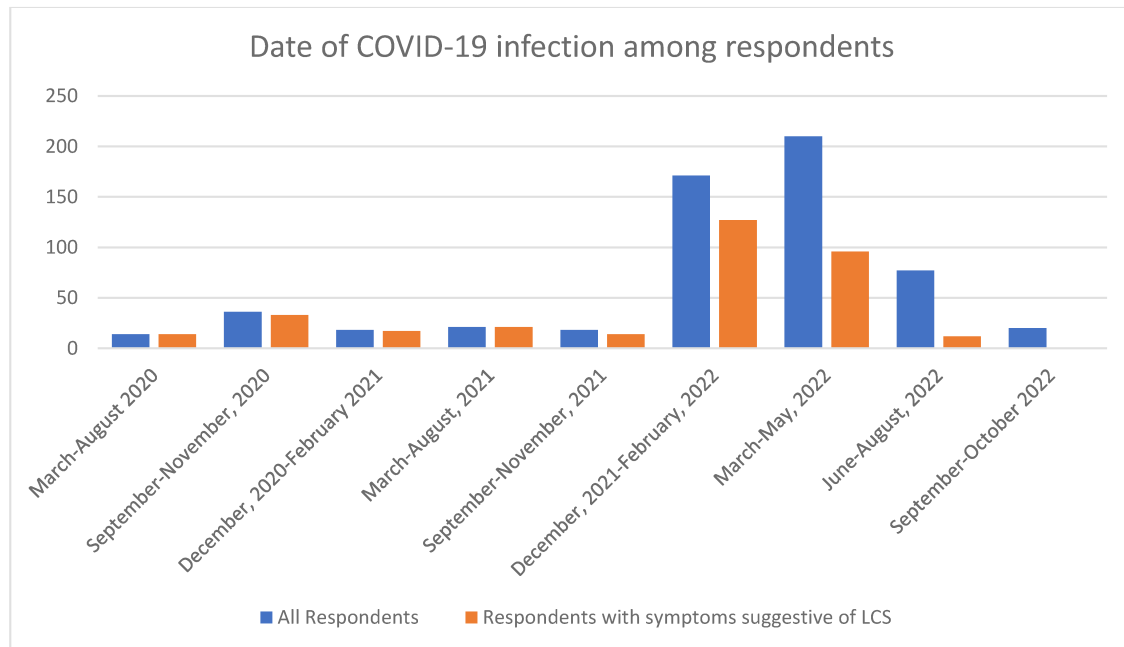

Supplement: bmjopen-2023-075301supp004.pdf [file bmjopen-2023-075301supp004.pdf]
